# Supplementary material
Source: publisher site journal article supplement (https://www.dovepress.com/article/452117)
Supplement: Supplementary file 1 [file get_supplementary_file.php]

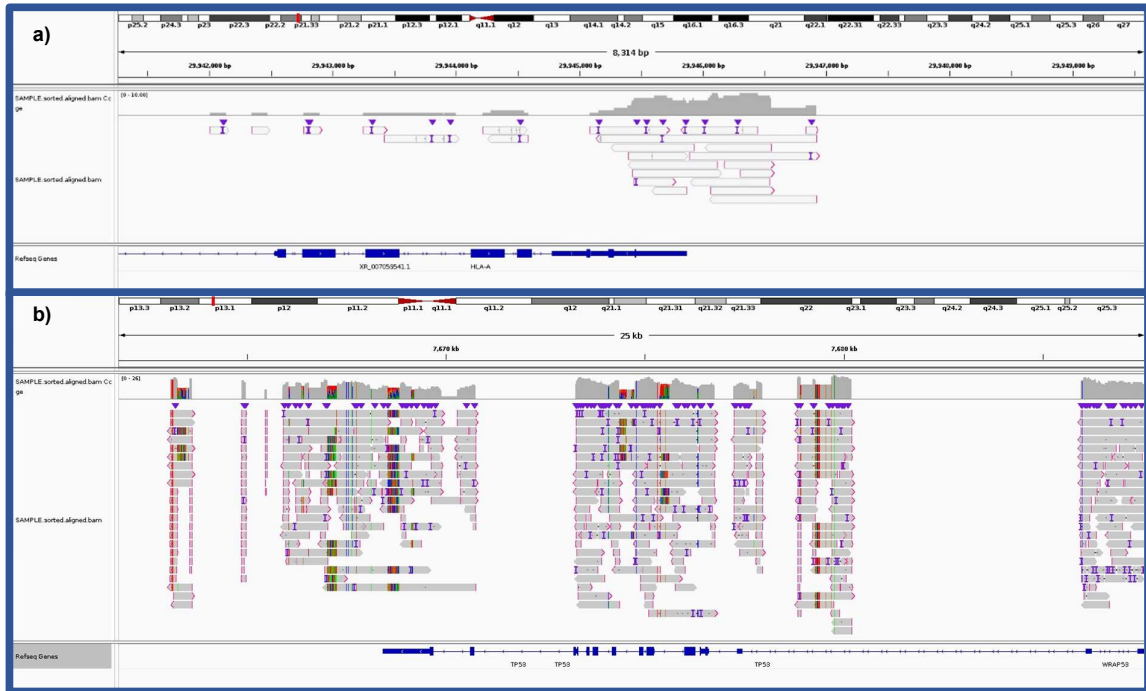

Supplementary Figure 1: Gene viewed in IGV Browser - representative of CNV gene loss, reads filled with white empty space means loss of reads that can properly aligned to reference genome, in this example HLA-A gene (Supplementary Fig. 1a); representative of no gene loss, reads filled with grey means properly aligned to reference genome with coloured bases mean single nucleotide variations, in this example TP53 gene (Supplementary Fig. 1b)

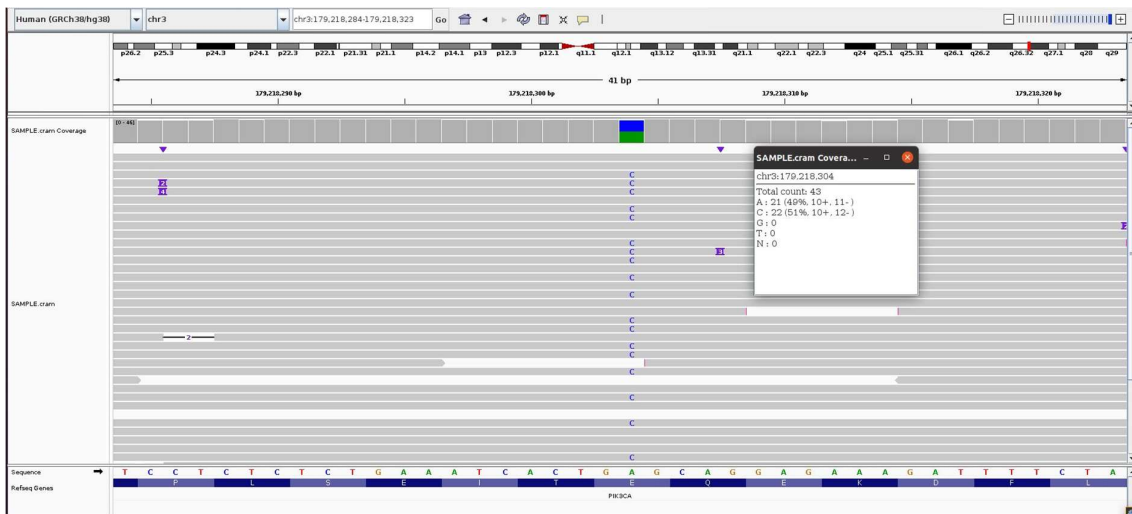

Supplementary Figure 2: The IGV browser view of the NM\_006218.4:c.1634A>C variant. Within the position of the variant, 22 reads were mapped as C, instead of A, confirming the presence of the variant.

Supplementary Table 1: List of genes with total loss at chromosome 6 from position 28,500,000 until 33,500,000. Shaded rows highlighted significant genes when altered may relate to cancer or render immune system defective.

| Gene name | Chromosome | Gene Position |          | Gene type      | Cancer / Immune Related Pathway                     |                                                     |
|-----------|------------|---------------|----------|----------------|-----------------------------------------------------|-----------------------------------------------------|
|           |            | Start (bp)    | End (bp) |                |                                                     |                                                     |
| HLA-F     | 6          | 29722775      | 29738528 | protein coding | Antigen processing and presentation (Immune system) |                                                     |
| HLA-G     | 6          | 29826967      | 29831125 | protein coding | Antigen processing and presentation (Immune system) |                                                     |
| HLA-A     | 6          | 29941260      | 29949572 | protein coding | Antigen processing and presentation (Immune system) |                                                     |
| HLA-E     | 6          | 30489509      | 30494194 | protein coding | Antigen processing and presentation (Immune system) |                                                     |
| HLA-C     | 6          | 31268749      | 31272130 | protein coding | Antigen processing and presentation (Immune system) |                                                     |
| HLA-B     | 6          | 31353872      | 31367067 | protein coding | Antigen processing and presentation (Immune system) |                                                     |
| MICB      | 6          | 31494881      | 31511124 | protein coding | Antigen processing and presentation (Immune system) |                                                     |
| HLA-DRA   | 6          | 32439878      | 32445046 | protein coding | Antigen processing and presentation (Immune system) |                                                     |
| HLA-DRB5  | 6          | 32517353      | 32530287 | protein coding | Antigen processing and presentation (Immune system) |                                                     |
| HLA-DRB1  | 6          | 32577902      | 32589848 | protein coding | Antigen processing and presentation (Immune system) |                                                     |
| HLA-DQA1  | 6          | 32628179      | 32647062 | protein coding | Antigen processing and presentation (Immune system) |                                                     |
| HLA-DQB1  | 6          | 32659467      | 32668383 | protein coding | Antigen processing and presentation (Immune system) |                                                     |
| HLA-DOA2  | 6          | 32741391      | 32747198 | protein coding | Antigen processing and presentation (Immune system) |                                                     |
| HLA-DOB   | 6          | 32812763      | 32820466 | protein coding | Antigen processing and presentation (Immune system) |                                                     |
| TAP2      | 6          | 32821833      | 32838739 | protein coding | Antigen processing and presentation (Immune system) |                                                     |
| TAP1      | 6          | 32845209      | 32853816 | protein coding | Antigen processing and presentation (Immune system) |                                                     |
| HLA-DMB   | 6          | 32934629      | 32941028 | protein coding | Antigen processing and presentation (Immune system) |                                                     |
| HLA-DMA   | 6          | 32948613      | 32969094 | protein coding | Antigen processing and presentation (Immune system) |                                                     |
| HLA-DOA   | 6          | 33004182      | 33009591 | protein coding | Antigen processing and presentation (Immune system) |                                                     |
| HLA-DPA1  | 6          | 33064569      | 33080775 | protein coding | Antigen processing and presentation (Immune system) |                                                     |
| HLA-DPB1  | 6          | 33075990      | 33089696 | protein coding | Antigen processing and presentation (Immune system) |                                                     |
| TAPBP     | 6          | 33299694      | 33314284 | protein coding | Antigen processing and presentation (Immune system) |                                                     |
| TNF       | 6          | 31575565      | 31578336 | protein coding | Apoptosis Signalling                                | Complement and coagulation cascades (Immune system) |
| C2        | 6          | 31897785      | 31945673 | protein coding | Complement and coagulation cascades (Immune system) |                                                     |
| CFB       | 6          | 31945650      | 31952086 | protein coding | Complement and coagulation cascades (Immune system) |                                                     |

|           |   |          |          |                        |                                                     |                                     |
|-----------|---|----------|----------|------------------------|-----------------------------------------------------|-------------------------------------|
| C4A       | 6 | 31982057 | 32002681 | protein_coding         | Complement and coagulation cascades (Immune system) |                                     |
| C4B       | 6 | 32014795 | 32035418 | protein_coding         | Complement and coagulation cascades (Immune system) |                                     |
| ATF6B     | 6 | 32115264 | 32128253 | protein_coding         | ERK Signalling                                      | Chemokine signaling (Immune system) |
| TUBB      | 6 | 30717435 | 30725538 | protein_coding         | Fc gamma R-mediated phagocytosis (Immune system)    |                                     |
| GPSM3     | 6 | 32190766 | 32195523 | protein_coding         | NOD-like receptor (Immune system)                   |                                     |
| NOTCH4    | 6 | 32194843 | 32224067 | protein_coding         | NOTCH Signalling                                    |                                     |
| GPX6      | 6 | 28503296 | 28528215 | protein_coding         |                                                     |                                     |
| GPX5      | 6 | 28525881 | 28534955 | protein_coding         |                                                     |                                     |
| SCAND3    | 6 | 28570535 | 28616212 | protein_coding         |                                                     |                                     |
| ZBED9-AS1 | 6 | 28587378 | 28591747 | lncRNA                 |                                                     |                                     |
|           | 6 | 28633381 | 28633594 | processed_pseudogene   |                                                     |                                     |
|           | 6 | 28634861 | 28649538 | lncRNA                 |                                                     |                                     |
| LINC00533 | 6 | 28648286 | 28649066 | lncRNA                 |                                                     |                                     |
| RPSAP2    | 6 | 28732017 | 28732904 | processed_pseudogene   |                                                     |                                     |
| NOP56P1   | 6 | 28783633 | 28784004 | processed_pseudogene   |                                                     |                                     |
|           | 6 | 28837240 | 28839058 | lncRNA                 |                                                     |                                     |
| LINC01623 | 6 | 28859625 | 28864630 | lncRNA                 |                                                     |                                     |
| RPL13P    | 6 | 28861416 | 28862047 | processed_pseudogene   |                                                     |                                     |
| ZNF90P2   | 6 | 28888832 | 28889906 | processed_pseudogene   |                                                     |                                     |
| HCG14     | 6 | 28896530 | 28897322 | lncRNA                 |                                                     |                                     |
| TRIM27    | 6 | 28903002 | 28923988 | protein_coding         |                                                     |                                     |
| RNU6-930P | 6 | 28915645 | 28915744 | snRNA                  |                                                     |                                     |
| LINC01556 | 6 | 28943877 | 28944537 | lncRNA                 |                                                     |                                     |
| KRT18P1   | 6 | 28969130 | 28970460 | processed_pseudogene   |                                                     |                                     |
| RN7SL471P | 6 | 28977475 | 28977773 | misc_RNA               |                                                     |                                     |
| HCG15     | 6 | 28986203 | 28987484 | lncRNA                 |                                                     |                                     |
|           | 6 | 28986800 | 28988536 | lncRNA                 |                                                     |                                     |
| ZNF311    | 6 | 28994785 | 29005316 | protein_coding         |                                                     |                                     |
| OR2AD1P   | 6 | 29026680 | 29027607 | unprocessed_pseudogene |                                                     |                                     |
| OR2W1-AS1 | 6 | 29036021 | 29076524 | lncRNA                 |                                                     |                                     |

|           |   |          |          |                                    |  |  |
|-----------|---|----------|----------|------------------------------------|--|--|
| OR2W1     | 6 | 29044213 | 29045175 | protein coding                     |  |  |
| OR2P1P    | 6 | 29071824 | 29072599 | unprocessed_pseudogene             |  |  |
| SAR1AP1   | 6 | 29076573 | 29077168 | processed_pseudogene               |  |  |
| OR2B3     | 6 | 29086208 | 29087313 | protein coding                     |  |  |
| OR2J1     | 6 | 29099490 | 29102701 | protein coding                     |  |  |
| OR2J3     | 6 | 29108058 | 29114770 | protein coding                     |  |  |
|           | 6 | 29124210 | 29128908 | lncRNA                             |  |  |
|           | 6 | 29137410 | 29142934 | lncRNA                             |  |  |
| OR2N1P    | 6 | 29137880 | 29138816 | transcribed_unprocessed_pseudogene |  |  |
|           | 6 | 29162475 | 29166201 | lncRNA                             |  |  |
| OR2J2     | 6 | 29170907 | 29175811 | protein coding                     |  |  |
| OR2J4P    | 6 | 29181510 | 29182445 | unprocessed_pseudogene             |  |  |
|           | 6 | 29212886 | 29216933 | lncRNA                             |  |  |
| OR2H4P    | 6 | 29215236 | 29216179 | transcribed_unprocessed_pseudogene |  |  |
| LINC03003 | 6 | 29223973 | 29292963 | lncRNA                             |  |  |
| OR2G1P    | 6 | 29229227 | 29230157 | unprocessed_pseudogene             |  |  |
| OR2U1P    | 6 | 29262703 | 29264079 | unprocessed_pseudogene             |  |  |
| OR2U2P    | 6 | 29268462 | 29269421 | unprocessed_pseudogene             |  |  |
| LINC03003 | 6 | 29290711 | 29291653 | transcribed_unprocessed_pseudogene |  |  |
| OR14J1    | 6 | 29301701 | 29313017 | protein coding                     |  |  |
| DDX6P1    | 6 | 29329626 | 29331061 | processed_pseudogene               |  |  |
| OR5V1     | 6 | 29353749 | 29431967 | protein coding                     |  |  |
| OR12D3    | 6 | 29373423 | 29375291 | protein coding                     |  |  |
| OR12D2    | 6 | 29395631 | 29398008 | protein coding                     |  |  |
| OR12D1    | 6 | 29414928 | 29418905 | protein coding                     |  |  |
| OR11A1    | 6 | 29425504 | 29457071 | protein coding                     |  |  |
| OR10C1    | 6 | 29439306 | 29440977 | protein coding                     |  |  |
|           | 6 | 29450210 | 29450558 | processed_pseudogene               |  |  |
| OR2H1     | 6 | 29457155 | 29464328 | protein coding                     |  |  |
| UBDP1     | 6 | 29464596 | 29469806 | unprocessed_pseudogene             |  |  |

|            |   |          |          |                                    |  |  |
|------------|---|----------|----------|------------------------------------|--|--|
| MAS1LP1    | 6 | 29475025 | 29476071 | unprocessed_pseudogene             |  |  |
|            | 6 | 29485157 | 29494160 | lncRNA                             |  |  |
| MAS1L      | 6 | 29486697 | 29487956 | protein_coding                     |  |  |
| RPS17P1    | 6 | 29489271 | 29489676 | processed_pseudogene               |  |  |
| LINC02829  | 6 | 29497475 | 29510558 | lncRNA                             |  |  |
| LINC01015  | 6 | 29528721 | 29533665 | lncRNA                             |  |  |
| GPR53P     | 6 | 29537704 | 29538787 | unprocessed_pseudogene             |  |  |
| OR211P     | 6 | 29550407 | 29557773 | protein_coding                     |  |  |
| UBD        | 6 | 29555515 | 29559732 | protein_coding                     |  |  |
| GABBR1     | 6 | 29555629 | 29633976 | protein_coding                     |  |  |
| OR2H5P     | 6 | 29573909 | 29574836 | unprocessed_pseudogene             |  |  |
| TMEM183AP1 | 6 | 29577459 | 29577748 | processed_pseudogene               |  |  |
| SNORD32B   | 6 | 29582249 | 29582332 | snoRNA                             |  |  |
| RPL13AP    | 6 | 29582508 | 29583025 | processed_pseudogene               |  |  |
| OR2H2      | 6 | 29585121 | 29590500 | protein_coding                     |  |  |
| SUMO2P1    | 6 | 29636060 | 29636343 | processed_pseudogene               |  |  |
| MOG        | 6 | 29657002 | 29672372 | protein_coding                     |  |  |
| ZFP57      | 6 | 29672483 | 29681155 | protein_coding                     |  |  |
| ZDHHC20P1  | 6 | 29708125 | 29708547 | processed_pseudogene               |  |  |
|            | 6 | 29722981 | 29723971 | unprocessed_pseudogene             |  |  |
| HLA-F-AS1  | 6 | 29726601 | 29749049 | lncRNA                             |  |  |
| RPL23AP1   | 6 | 29726669 | 29727139 | transcribed_processed_pseudogene   |  |  |
| MICE       | 6 | 29741731 | 29748969 | transcribed_unprocessed_pseudogene |  |  |
| HCG9P5     | 6 | 29748289 | 29748513 | unprocessed_pseudogene             |  |  |
| Y_RNA      | 6 | 29750371 | 29750472 | misc_RNA                           |  |  |
| IFITM4P    | 6 | 29750729 | 29751148 | processed_pseudogene               |  |  |
|            | 6 | 29751965 | 29752207 | lncRNA                             |  |  |
|            | 6 | 29752573 | 29763295 | lncRNA                             |  |  |
|            | 6 | 29763258 | 29763392 | processed_pseudogene               |  |  |
| HLA-V      | 6 | 29790954 | 29797811 | lncRNA                             |  |  |

|           |   |          |          |                                    |  |  |
|-----------|---|----------|----------|------------------------------------|--|--|
| HCG4      | 6 | 29791753 | 29792750 | unprocessed_pseudogene             |  |  |
| HLA-V     | 6 | 29792234 | 29793136 | transcribed_unprocessed_pseudogene |  |  |
| HLA-P     | 6 | 29800415 | 29802425 | unprocessed_pseudogene             |  |  |
| RPL7AP7   | 6 | 29803195 | 29803991 | processed_pseudogene               |  |  |
| MICG      | 6 | 29812565 | 29812696 | unprocessed_pseudogene             |  |  |
| HCG4P8    | 6 | 29827385 | 29828364 | unprocessed_pseudogene             |  |  |
|           | 6 | 29849550 | 29885615 | lncRNA                             |  |  |
|           | 6 | 29852363 | 29852491 | transcribed_unprocessed_pseudogene |  |  |
| HCP5B     | 6 | 29871895 | 29873783 | lncRNA                             |  |  |
|           | 6 | 29887294 | 29888268 | unprocessed_pseudogene             |  |  |
| HLA-H     | 6 | 29887752 | 29890482 | unprocessed_pseudogene             |  |  |
| HLA-T     | 6 | 29896654 | 29897786 | unprocessed_pseudogene             |  |  |
| DDX39BP1  | 6 | 29906543 | 29906909 | unprocessed_pseudogene             |  |  |
| MCCD1P1   | 6 | 29907783 | 29908645 | unprocessed_pseudogene             |  |  |
| HCG4B     | 6 | 29925983 | 29926973 | unprocessed_pseudogene             |  |  |
| HLA-K     | 6 | 29926459 | 29929232 | unprocessed_pseudogene             |  |  |
| HLA-U     | 6 | 29934101 | 29934286 | unprocessed_pseudogene             |  |  |
|           | 6 | 29942075 | 29943067 | unprocessed_pseudogene             |  |  |
| HLA-W     | 6 | 29956596 | 29958570 | unprocessed_pseudogene             |  |  |
| MICD      | 6 | 29970801 | 29972464 | unprocessed_pseudogene             |  |  |
| HCG9      | 6 | 29975112 | 29978410 | lncRNA                             |  |  |
| POLR1HASP | 6 | 29976042 | 30061640 | transcribed_unitary_pseudogene     |  |  |
| DDX39BP2  | 6 | 29993209 | 29993605 | unprocessed_pseudogene             |  |  |
| MCCD1P2   | 6 | 29994437 | 29995314 | unprocessed_pseudogene             |  |  |
|           | 6 | 30005971 | 30009956 | lncRNA                             |  |  |
|           | 6 | 30006121 | 30007116 | unprocessed_pseudogene             |  |  |
| HLA-J     | 6 | 30006606 | 30009539 | transcribed_unprocessed_pseudogene |  |  |
| ETF1P1    | 6 | 30031713 | 30033003 | processed_pseudogene               |  |  |
|           | 6 | 30035916 | 30035983 | misc_RNA                           |  |  |
|           | 6 | 30058115 | 30058190 | misc_RNA                           |  |  |

|              |   |          |          |                                    |  |  |
|--------------|---|----------|----------|------------------------------------|--|--|
| POLR1H       | 6 | 30058899 | 30064909 | protein_coding                     |  |  |
|              | 6 | 30061080 | 30061183 | misc_RNA                           |  |  |
| PPP1R11      | 6 | 30066709 | 30070333 | protein_coding                     |  |  |
| RNF39        | 6 | 30070266 | 30075849 | protein_coding                     |  |  |
| TRIM31       | 6 | 30102897 | 30113090 | protein_coding                     |  |  |
| TRIM31-AS1   | 6 | 30105240 | 30114724 | lncRNA                             |  |  |
|              | 6 | 30132805 | 30132966 | snoRNA                             |  |  |
| TRIM40       | 6 | 30136124 | 30148735 | protein_coding                     |  |  |
| TRIM10       | 6 | 30151943 | 30161211 | protein_coding                     |  |  |
| TRIM15       | 6 | 30163206 | 30172693 | protein_coding                     |  |  |
| TRIM26       | 6 | 30184455 | 30213427 | protein_coding                     |  |  |
| PAIP1P1      | 6 | 30186798 | 30188614 | processed_pseudogene               |  |  |
| HCG17        | 6 | 30234039 | 30326134 | lncRNA                             |  |  |
| TRIM26BP     | 6 | 30238301 | 30242279 | unprocessed_pseudogene             |  |  |
| HLA-L        | 6 | 30259548 | 30293015 | lncRNA                             |  |  |
| HLA-L        | 6 | 30259625 | 30261703 | transcribed_unprocessed_pseudogene |  |  |
|              | 6 | 30282349 | 30286054 | TEC                                |  |  |
| HCG18        | 6 | 30286690 | 30327382 | lncRNA                             |  |  |
| TRIM39       | 6 | 30326479 | 30343729 | protein_coding                     |  |  |
| TRIM39-RPP21 | 6 | 30328907 | 30346854 | protein_coding                     |  |  |
| RPP21        | 6 | 30345131 | 30346884 | protein_coding                     |  |  |
| HLA-N        | 6 | 30351416 | 30351550 | unprocessed_pseudogene             |  |  |
|              | 6 | 30359278 | 30359911 | processed_pseudogene               |  |  |
| UBQLN1P1     | 6 | 30363112 | 30364280 | processed_pseudogene               |  |  |
| MICC         | 6 | 30414715 | 30419319 | unprocessed_pseudogene             |  |  |
|              | 6 | 30451139 | 30456212 | lncRNA                             |  |  |
|              | 6 | 30460825 | 30481634 | lncRNA                             |  |  |
| TMPOP1       | 6 | 30466452 | 30467994 | processed_pseudogene               |  |  |
| SUCLA2P1     | 6 | 30468882 | 30470251 | processed_pseudogene               |  |  |
| RANP1        | 6 | 30485940 | 30486590 | processed_pseudogene               |  |  |

|           |   |          |          |                      |  |  |
|-----------|---|----------|----------|----------------------|--|--|
| LINC02569 | 6 | 30516266 | 30519217 | lncRNA               |  |  |
| GNL1      | 6 | 30541381 | 30556489 | protein_coding       |  |  |
| PRR3      | 6 | 30557280 | 30563723 | protein_coding       |  |  |
|           | 6 | 30570638 | 30571273 | lncRNA               |  |  |
| ABCF1     | 6 | 30571393 | 30597179 | protein_coding       |  |  |
| MIR877    | 6 | 30584332 | 30584417 | miRNA                |  |  |
| PPP1R10   | 6 | 30600413 | 30618612 | protein_coding       |  |  |
| MRPS18B   | 6 | 30617840 | 30626395 | protein_coding       |  |  |
| ATAT1     | 6 | 30626842 | 30646823 | protein_coding       |  |  |
| PTMAP1    | 6 | 30633632 | 30633956 | processed_pseudogene |  |  |
| C6orf136  | 6 | 30647039 | 30653210 | protein_coding       |  |  |
| DHX16     | 6 | 30653119 | 30673006 | protein_coding       |  |  |
| PPP1R18   | 6 | 30676389 | 30687895 | protein_coding       |  |  |
| NRM       | 6 | 30688047 | 30691420 | protein_coding       |  |  |
| RPL7P4    | 6 | 30696806 | 30697535 | processed_pseudogene |  |  |
| MDC1      | 6 | 30699807 | 30717447 | protein_coding       |  |  |
| MDC1-AS1  | 6 | 30703067 | 30713184 | lncRNA               |  |  |
|           | 6 | 30723105 | 30723877 | lncRNA               |  |  |
| FLOT1     | 6 | 30727709 | 30742732 | protein_coding       |  |  |
| Y_RNA     | 6 | 30736304 | 30736414 | misc_RNA             |  |  |
| IER3-AS1  | 6 | 30742757 | 30743638 | lncRNA               |  |  |
| IER3      | 6 | 30743199 | 30744548 | protein_coding       |  |  |
| HCG20     | 6 | 30743790 | 30792250 | lncRNA               |  |  |
| RN7SL353P | 6 | 30751038 | 30751289 | misc_RNA             |  |  |
| LINC00243 | 6 | 30798211 | 30830659 | lncRNA               |  |  |
| LINC02570 | 6 | 30838324 | 30848204 | lncRNA               |  |  |
| RN7SKP186 | 6 | 30864250 | 30864552 | misc_RNA             |  |  |
| DDR1-DT   | 6 | 30866982 | 30875918 | lncRNA               |  |  |
| DDR1      | 6 | 30876421 | 30900156 | protein_coding       |  |  |
| MIR4640   | 6 | 30890883 | 30890972 | miRNA                |  |  |



|            |   |          |          |                        |  |  |
|------------|---|----------|----------|------------------------|--|--|
| GTF2H4     | 6 | 30908207 | 30914106 | protein_coding         |  |  |
|            | 6 | 30908242 | 30926459 | lncRNA                 |  |  |
| VAR2       | 6 | 30914205 | 30926459 | protein_coding         |  |  |
| SFTA2      | 6 | 30931353 | 30955636 | protein_coding         |  |  |
| Y_RNA      | 6 | 30932618 | 30932709 | misc_RNA               |  |  |
| MUCL3      | 6 | 30934523 | 30954221 | protein_coding         |  |  |
| HCG21      | 6 | 30945979 | 30954862 | lncRNA                 |  |  |
| NAPGP2     | 6 | 30961403 | 30962396 | processed_pseudogene   |  |  |
| MUC21      | 6 | 30983718 | 30989903 | protein_coding         |  |  |
| MUC22      | 6 | 31010474 | 31035402 | protein_coding         |  |  |
| HCG22      | 6 | 31053450 | 31059890 | protein_coding         |  |  |
| RNU6-1133P | 6 | 31083010 | 31083109 | snRNA                  |  |  |
| C6orf15    | 6 | 31111223 | 31112575 | protein_coding         |  |  |
| PSORS1C1   | 6 | 31114750 | 31140092 | protein_coding         |  |  |
| CDSN       | 6 | 31115087 | 31120446 | protein_coding         |  |  |
| PSORS1C2   | 6 | 31137534 | 31139066 | protein_coding         |  |  |
| POLR2LP1   | 6 | 31140727 | 31140913 | processed_pseudogene   |  |  |
| CCHCR1     | 6 | 31142439 | 31158238 | protein_coding         |  |  |
| TCF19      | 6 | 31158331 | 31167159 | protein_coding         |  |  |
| POU5F1     | 6 | 31164337 | 31180731 | protein_coding         |  |  |
| PSORS1C3   | 6 | 31173735 | 31177899 | lncRNA                 |  |  |
|            | 6 | 31195200 | 31198037 | lncRNA                 |  |  |
| HCG27      | 6 | 31197760 | 31203968 | lncRNA                 |  |  |
|            | 6 | 31200165 | 31201918 | lncRNA                 |  |  |
|            | 6 | 31222913 | 31223093 | unprocessed_pseudogene |  |  |
|            | 6 | 31224342 | 31225058 | unprocessed_pseudogene |  |  |
|            | 6 | 31272240 | 31272590 | lncRNA                 |  |  |
| USP8P1     | 6 | 31275572 | 31278754 | processed_pseudogene   |  |  |
| RPL3P2     | 6 | 31280317 | 31281519 | processed_pseudogene   |  |  |
| WASF5P     | 6 | 31287510 | 31288964 | processed_pseudogene   |  |  |

|                     |   |          |          |                                  |  |  |
|---------------------|---|----------|----------|----------------------------------|--|--|
| LINC02571           | 6 | 31293908 | 31301642 | lncRNA                           |  |  |
|                     | 6 | 31307815 | 31308549 | unprocessed_pseudogene           |  |  |
| MIR6891             | 6 | 31355224 | 31355316 | miRNA                            |  |  |
|                     | 6 | 31356647 | 31357637 | unprocessed_pseudogene           |  |  |
| DHFRP2              | 6 | 31360865 | 31367354 | transcribed_processed_pseudogene |  |  |
|                     | 6 | 31367057 | 31376088 | lncRNA                           |  |  |
| RNU6-283P           | 6 | 31370134 | 31370240 | snRNA                            |  |  |
| FGFR3P1             | 6 | 31377419 | 31378019 | processed_pseudogene             |  |  |
| ZDHHC20P2           | 6 | 31380411 | 31380839 | processed_pseudogene             |  |  |
| HLA-S               | 6 | 31382074 | 31382288 | unprocessed_pseudogene           |  |  |
|                     | 6 | 31394289 | 31395495 | lncRNA                           |  |  |
| MICA                | 6 | 31399784 | 31415315 | protein_coding                   |  |  |
|                     | 6 | 31400702 | 31463705 | lncRNA                           |  |  |
| Y RNA               | 6 | 31402152 | 31402250 | misc_RNA                         |  |  |
| LINC01149           | 6 | 31441667 | 31446973 | lncRNA                           |  |  |
|                     | 6 | 31462728 | 31463336 | unprocessed_pseudogene           |  |  |
| HCP5                | 6 | 31463170 | 31478936 | lncRNA                           |  |  |
| MICB-DT             | 6 | 31479973 | 31494935 | lncRNA                           |  |  |
| Y_RNA               | 6 | 31496689 | 31496790 | misc_RNA                         |  |  |
|                     | 6 | 31515979 | 31516211 | unprocessed_pseudogene           |  |  |
| PPIAP9              | 6 | 31519480 | 31520291 | processed_pseudogene             |  |  |
| RPL15P4             | 6 | 31528114 | 31528693 | processed_pseudogene             |  |  |
| MCCD1               | 6 | 31528962 | 31530232 | protein_coding                   |  |  |
| DDX39B              | 6 | 31530219 | 31542448 | protein_coding                   |  |  |
| ATP6V1G2-<br>DDX39B | 6 | 31530219 | 31546608 | protein_coding                   |  |  |
| SNORD117            | 6 | 31536374 | 31536449 | snoRNA                           |  |  |
| SNORD84             | 6 | 31541101 | 31541178 | snoRNA                           |  |  |
| DDX39B-AS1          | 6 | 31542304 | 31543138 | lncRNA                           |  |  |
| ATP6V1G2            | 6 | 31544444 | 31548427 | protein_coding                   |  |  |
| NFKBIL1             | 6 | 31546870 | 31558829 | protein_coding                   |  |  |

|               |   |          |          |                                |  |  |
|---------------|---|----------|----------|--------------------------------|--|--|
|               | 6 | 31560244 | 31572700 | lncRNA                         |  |  |
| LTA           | 6 | 31572054 | 31574324 | protein_coding                 |  |  |
| LTB           | 6 | 31580525 | 31582522 | protein_coding                 |  |  |
| LST1          | 6 | 31586124 | 31588909 | protein_coding                 |  |  |
| NCR3          | 6 | 31588895 | 31593006 | protein_coding                 |  |  |
| UQCRHP1       | 6 | 31611083 | 31611356 | processed_pseudogene           |  |  |
| AIF1          | 6 | 31615217 | 31617021 | protein_coding                 |  |  |
|               | 6 | 31619847 | 31620406 | lncRNA                         |  |  |
| PRRC2A        | 6 | 31620715 | 31637771 | protein_coding                 |  |  |
|               | 6 | 31622774 | 31622860 | protein_coding                 |  |  |
| SNORA38       | 6 | 31623079 | 31623210 | snoRNA                         |  |  |
|               | 6 | 31623874 | 31625499 | protein_coding                 |  |  |
| MIR6832       | 6 | 31633787 | 31633858 | miRNA                          |  |  |
| BAG6          | 6 | 31639028 | 31652705 | protein_coding                 |  |  |
| APOM          | 6 | 31652416 | 31658210 | protein_coding                 |  |  |
| C6orf47       | 6 | 31658298 | 31660778 | protein_coding                 |  |  |
| C6orf47-AS1   | 6 | 31658329 | 31660721 | lncRNA                         |  |  |
| GPANK1        | 6 | 31661228 | 31666283 | protein_coding                 |  |  |
| Y_RNA         | 6 | 31663288 | 31663401 | misc_RNA                       |  |  |
| CSNK2B        | 6 | 31665227 | 31670343 | protein_coding                 |  |  |
|               | 6 | 31666102 | 31673546 | protein_coding                 |  |  |
| LY6G5B        | 6 | 31669976 | 31673776 | protein_coding                 |  |  |
| LY6G5C        | 6 | 31676684 | 31684040 | protein_coding                 |  |  |
| ABHD16A       | 6 | 31686955 | 31703356 | protein_coding                 |  |  |
|               | 6 | 31686962 | 31714072 | lncRNA                         |  |  |
| MIR4646       | 6 | 31701029 | 31701091 | miRNA                          |  |  |
| LY6G6F        | 6 | 31706866 | 31710679 | protein_coding                 |  |  |
| LY6G6F-LY6G6D | 6 | 31706904 | 31717918 | protein_coding                 |  |  |
| LY6G6E        | 6 | 31711771 | 31714065 | transcribed_unitary_pseudogene |  |  |
| LY6G6D        | 6 | 31715348 | 31717919 | protein_coding                 |  |  |

|             |   |          |          |                |  |  |
|-------------|---|----------|----------|----------------|--|--|
| MPIG6B      | 6 | 31718594 | 31726714 | protein_coding |  |  |
| LY6G6C      | 6 | 31718648 | 31721746 | protein_coding |  |  |
| DDAH2       | 6 | 31727038 | 31730617 | protein_coding |  |  |
| CLIC1       | 6 | 31730581 | 31739763 | protein_coding |  |  |
| MSH5        | 6 | 31739677 | 31762676 | protein_coding |  |  |
| MSH5-SAPCD1 | 6 | 31740020 | 31764851 | protein_coding |  |  |
| RNU6-850P   | 6 | 31756951 | 31757053 | snRNA          |  |  |
| SAPCD1      | 6 | 31762656 | 31764850 | protein_coding |  |  |
| SAPCD1-AS1  | 6 | 31764310 | 31765588 | lncRNA         |  |  |
| VWA7        | 6 | 31765590 | 31777328 | protein_coding |  |  |
| VAR51       | 6 | 31777518 | 31795752 | protein_coding |  |  |
| Y_RNA       | 6 | 31778817 | 31778905 | misc_RNA       |  |  |
| LSM2        | 6 | 31797396 | 31806966 | protein_coding |  |  |
| HSPA1L      | 6 | 31809619 | 31815283 | protein_coding |  |  |
| HSPA1A      | 6 | 31815543 | 31817946 | protein_coding |  |  |
|             | 6 | 31821149 | 31821964 | lncRNA         |  |  |
|             | 6 | 31826841 | 31827443 | lncRNA         |  |  |
| HSPA1B      | 6 | 31827738 | 31830254 | protein_coding |  |  |
|             | 6 | 31828834 | 31839719 | lncRNA         |  |  |
| SNHG32      | 6 | 31834608 | 31839766 | lncRNA         |  |  |
| SNORD48     | 6 | 31835263 | 31835326 | snoRNA         |  |  |
| SNORD52     | 6 | 31837076 | 31837142 | snoRNA         |  |  |
| NEU1        | 6 | 31857659 | 31862905 | protein_coding |  |  |
| SLC44A4     | 6 | 31863192 | 31879046 | protein_coding |  |  |
| EHMT2-AS1   | 6 | 31877808 | 31884204 | lncRNA         |  |  |
| EHMT2       | 6 | 31879759 | 31897698 | protein_coding |  |  |
| ZBTB12      | 6 | 31899613 | 31902086 | protein_coding |  |  |
|             | 6 | 31927698 | 31952048 | protein_coding |  |  |
| C2-AS1      | 6 | 31934474 | 31941724 | lncRNA         |  |  |
| NELFE       | 6 | 31952087 | 31959038 | protein_coding |  |  |

|            |   |          |          |                                    |  |  |
|------------|---|----------|----------|------------------------------------|--|--|
| MIR1236    | 6 | 31956839 | 31956940 | miRNA                              |  |  |
| SKIC2      | 6 | 31959116 | 31969818 | protein_coding                     |  |  |
| DXO        | 6 | 31969810 | 31972290 | protein_coding                     |  |  |
| STK19      | 6 | 31971091 | 31982821 | protein_coding                     |  |  |
| C4A-AS1    | 6 | 31999976 | 32003521 | lncRNA                             |  |  |
|            | 6 | 32005636 | 32008451 | lncRNA                             |  |  |
| CYP21A1P   | 6 | 32005689 | 32008399 | transcribed_unprocessed_pseudogene |  |  |
| TNXA       | 6 | 32008614 | 32012472 | unprocessed_pseudogene             |  |  |
| STK19B     | 6 | 32013270 | 32013787 | unprocessed_pseudogene             |  |  |
| C4B-AS1    | 6 | 32032713 | 32036258 | lncRNA                             |  |  |
| CYP21A2    | 6 | 32038327 | 32041644 | protein_coding                     |  |  |
| TNXB       | 6 | 32041153 | 32115334 | protein_coding                     |  |  |
| RNA5SP206  | 6 | 32078508 | 32078628 | rRNA_pseudogene                    |  |  |
|            | 6 | 32098176 | 32117610 | lncRNA                             |  |  |
|            | 6 | 32108406 | 32112849 | lncRNA                             |  |  |
| FKBPL      | 6 | 32128707 | 32130288 | protein_coding                     |  |  |
| PRRT1      | 6 | 32148359 | 32153083 | protein_coding                     |  |  |
|            | 6 | 32150495 | 32154373 | protein_coding                     |  |  |
|            | 6 | 32152802 | 32154365 | lncRNA                             |  |  |
| PPT2       | 6 | 32153441 | 32163678 | protein_coding                     |  |  |
| PPT2-EGFL8 | 6 | 32153845 | 32171978 | protein_coding                     |  |  |
| EGFL8      | 6 | 32164595 | 32168281 | protein_coding                     |  |  |
| AGPAT1     | 6 | 32168212 | 32178096 | protein_coding                     |  |  |
| MIR6721    | 6 | 32170030 | 32170116 | miRNA                              |  |  |
| RNF5       | 6 | 32178405 | 32180793 | protein_coding                     |  |  |
| MIR6833    | 6 | 32179816 | 32179876 | miRNA                              |  |  |
| AGER       | 6 | 32180968 | 32184322 | protein_coding                     |  |  |
|            | 6 | 32184733 | 32185882 | lncRNA                             |  |  |
| PBX2       | 6 | 32184733 | 32190202 | protein_coding                     |  |  |
| TSBP1-AS1  | 6 | 32254640 | 32407763 | lncRNA                             |  |  |

|              |   |          |          |                                    |  |  |
|--------------|---|----------|----------|------------------------------------|--|--|
| TSBP1        | 6 | 32288526 | 32371907 | protein coding                     |  |  |
| HNRNPA1P2    | 6 | 32325219 | 32326178 | processed_pseudogene               |  |  |
| RNU6-603P    | 6 | 32352877 | 32352983 | snRNA                              |  |  |
| BTNL2        | 6 | 32393339 | 32407181 | protein coding                     |  |  |
| HLA-DRB9     | 6 | 32459821 | 32473500 | unprocessed_pseudogene             |  |  |
| RNU1-61P     | 6 | 32549940 | 32550090 | snRNA                              |  |  |
| HLA-DRB6     | 6 | 32552713 | 32560022 | lncRNA                             |  |  |
| HLA-DRB6     | 6 | 32553046 | 32558186 | transcribed_unprocessed_pseudogene |  |  |
| HLA-DQB1-AS1 | 6 | 32659880 | 32660729 | lncRNA                             |  |  |
| MTCO3P1      | 6 | 32706124 | 32706955 | unprocessed_pseudogene             |  |  |
|              | 6 | 32718005 | 32719170 | lncRNA                             |  |  |
| HLA-DQB3     | 6 | 32730758 | 32731695 | unprocessed_pseudogene             |  |  |
| MIR3135B     | 6 | 32749912 | 32749979 | miRNA                              |  |  |
| HLA-DQB2     | 6 | 32756098 | 32763532 | protein coding                     |  |  |
|              | 6 | 32813767 | 32838822 | protein coding                     |  |  |
| PSMB8        | 6 | 32840717 | 32844679 | protein coding                     |  |  |
| PSMB8-AS1    | 6 | 32844078 | 32846500 | lncRNA                             |  |  |
| PSMB9        | 6 | 32844136 | 32859851 | protein coding                     |  |  |
| PPP1R2P1     | 6 | 32879171 | 32879848 | transcribed_processed_pseudogene   |  |  |
|              | 6 | 32893197 | 32894665 | lncRNA                             |  |  |
|              | 6 | 32894299 | 32903758 | lncRNA                             |  |  |
| HLA-Z        | 6 | 32896416 | 32896490 | unprocessed_pseudogene             |  |  |
|              | 6 | 32937364 | 32953122 | protein coding                     |  |  |
| BRD2         | 6 | 32968594 | 32981505 | protein coding                     |  |  |
|              | 6 | 32970232 | 32970886 | lncRNA                             |  |  |
|              | 6 | 32972065 | 32972853 | lncRNA                             |  |  |
| RPL32P1      | 6 | 33079451 | 33079860 | processed_pseudogene               |  |  |
| HLA-DPA2     | 6 | 33091753 | 33097295 | unprocessed_pseudogene             |  |  |
| COL11A2P1    | 6 | 33103794 | 33107330 | unprocessed_pseudogene             |  |  |
|              | 6 | 33112440 | 33119163 | lncRNA                             |  |  |

|           |   |          |          |                                    |  |  |
|-----------|---|----------|----------|------------------------------------|--|--|
| HLA-DPB2  | 6 | 33112516 | 33129084 | transcribed_unprocessed_pseudogene |  |  |
| HLA-DPA3  | 6 | 33131216 | 33143325 | unprocessed_pseudogene             |  |  |
| HCG24     | 6 | 33144783 | 33147767 | lncRNA                             |  |  |
| COL11A2   | 6 | 33162681 | 33192499 | protein_coding                     |  |  |
| RXRB      | 6 | 33193588 | 33200665 | protein_coding                     |  |  |
| RNY4P10   | 6 | 33199601 | 33199696 | misc_RNA                           |  |  |
| SLC39A7   | 6 | 33200305 | 33204439 | protein_coding                     |  |  |
| HSD17B8   | 6 | 33204655 | 33206831 | protein_coding                     |  |  |
|           | 6 | 33207081 | 33208473 | lncRNA                             |  |  |
| MIR219A1  | 6 | 33207835 | 33207944 | miRNA                              |  |  |
| RING1     | 6 | 33208500 | 33212722 | protein_coding                     |  |  |
| ZNF70P1   | 6 | 33215705 | 33216328 | processed_pseudogene               |  |  |
| HTATSF1P1 | 6 | 33237799 | 33239690 | processed_pseudogene               |  |  |
|           | 6 | 33246075 | 33246856 | lncRNA                             |  |  |
|           | 6 | 33247976 | 33249215 | lncRNA                             |  |  |
| HCG25     | 6 | 33249534 | 33255167 | lncRNA                             |  |  |
| VPS52     | 6 | 33250272 | 33272047 | protein_coding                     |  |  |
| RPS18     | 6 | 33272075 | 33276511 | protein_coding                     |  |  |
| B3GALT4   | 6 | 33277123 | 33284832 | protein_coding                     |  |  |
| WDR46     | 6 | 33279108 | 33289247 | protein_coding                     |  |  |
| MIR6873   | 6 | 33287227 | 33287289 | miRNA                              |  |  |
| PFDN6     | 6 | 33289302 | 33298401 | protein_coding                     |  |  |
| MIR6834   | 6 | 33290245 | 33290325 | miRNA                              |  |  |
| RGL2      | 6 | 33291654 | 33298942 | protein_coding                     |  |  |
|           | 6 | 33299479 | 33301090 | lncRNA                             |  |  |
| ZBTB22    | 6 | 33314406 | 33317942 | protein_coding                     |  |  |
| DAXX      | 6 | 33318558 | 33323016 | protein_coding                     |  |  |
|           | 6 | 33321386 | 33329286 | protein_coding                     |  |  |
| SMIM40    | 6 | 33323628 | 33329279 | protein_coding                     |  |  |
| MYL12BP3  | 6 | 33338978 | 33339495 | processed_pseudogene               |  |  |

|             |   |          |          |                      |  |  |
|-------------|---|----------|----------|----------------------|--|--|
| LYPLA2P1    | 6 | 33365548 | 33366243 | processed_pseudogene |  |  |
| RPL35AP4    | 6 | 33389374 | 33389475 | processed_pseudogene |  |  |
| KIFC1       | 6 | 33391823 | 33409896 | protein_coding       |  |  |
| RPL12P1     | 6 | 33400059 | 33400556 | processed_pseudogene |  |  |
| PHF1        | 6 | 33410399 | 33416453 | protein_coding       |  |  |
| CUTA        | 6 | 33416442 | 33418317 | protein_coding       |  |  |
| SYNGAP1     | 6 | 33419661 | 33453689 | protein_coding       |  |  |
| SYNGAP1-AS1 | 6 | 33437363 | 33454453 | lncRNA               |  |  |
| MIR5004     | 6 | 33438331 | 33438437 | miRNA                |  |  |
| ZBTB9       | 6 | 33453970 | 33457544 | protein_coding       |  |  |



Supplementary Table 2: List of genes with total loss at chromosome X from position 1 until 2,000,000. Shaded rows highlighted significant genes when altered may relate to cancer or render immune system defective.

| Gene name   | Chromosome | Gene Position |          | Gene type              | Cancer / Immune Related Pathway |                                 |
|-------------|------------|---------------|----------|------------------------|---------------------------------|---------------------------------|
|             |            | Start (bp)    | End (bp) |                        |                                 |                                 |
| PPP2R3B     | X          | 333933        | 386955   | protein_coding         | B cell receptor (Immune system) | T cell receptor (Immune system) |
| SLC25A6     | X          | 1386152       | 1392113  | protein_coding         | B cell receptor (Immune system) |                                 |
| IL3RA       | X          | 1336616       | 1382689  | protein_coding         | JAK-STAT Signalling             |                                 |
|             | X          | 253743        | 255091   | unprocessed_pseudogene |                                 |                                 |
| PLCXD1      | X          | 276322        | 303356   | protein_coding         |                                 |                                 |
| GTPBP6      | X          | 304529        | 318796   | protein_coding         |                                 |                                 |
| LINC00685   | X          | 320990        | 321851   | lncRNA                 |                                 |                                 |
|             | X          | 386980        | 405579   | lncRNA                 |                                 |                                 |
| Metazoa_SRP | X          | 388100        | 388389   | misc_RNA               |                                 |                                 |
|             | X          | 419157        | 421980   | lncRNA                 |                                 |                                 |
| FABP5P13    | X          | 523775        | 524102   | processed_pseudogene   |                                 |                                 |
| KRT18P53    | X          | 545236        | 545352   | processed_pseudogene   |                                 |                                 |
| SHOX        | X          | 624344        | 659411   | protein_coding         |                                 |                                 |
|             | X          | 990221        | 994365   | lncRNA                 |                                 |                                 |
| RPL14P5     | X          | 1008503       | 1010101  | processed_pseudogene   |                                 |                                 |
| CRLF2       | X          | 1190490       | 1212723  | protein_coding         |                                 |                                 |
| CRLF2       | X          | 1190490       | 1212723  | protein_coding         |                                 |                                 |
| CSF2RA      | X          | 1268800       | 1310381  | protein_coding         |                                 |                                 |
| MIR3690     | X          | 1293918       | 1293992  | miRNA                  |                                 |                                 |
| MIR3690     | X          | 1293918       | 1293992  | miRNA                  |                                 |                                 |
| RNA5SP498   | X          | 1300256       | 1300375  | rRNA_pseudogene        |                                 |                                 |
| LINC00106   | X          | 1396427       | 1399402  | lncRNA                 |                                 |                                 |
| ASMTL-AS1   | X          | 1401769       | 1414028  | lncRNA                 |                                 |                                 |
| ASMTL       | X          | 1403139       | 1453762  | protein_coding         |                                 |                                 |
| P2RY8       | X          | 1462581       | 1537185  | protein_coding         |                                 |                                 |
| AKAP17A     | X          | 1591604       | 1602520  | protein_coding         |                                 |                                 |
| ASMT        | X          | 1615059       | 1643081  | protein_coding         |                                 |                                 |
|             | X          | 1661795       | 1662306  | lncRNA                 |                                 |                                 |
| LINC02968   | X          | 1732584       | 1763212  | lncRNA                 |                                 |                                 |
|             | X          | 1767347       | 1768776  | lncRNA                 |                                 |                                 |

Supplementary Table 3: List of genes with single copy loss at chromosome 11 from position 1 until 3,500,000. Shaded rows highlighted significant genes when altered may relate to cancer or render immune system defective.

| Gene name | Chromosome | Gene Position |          | Gene type              | Cancer / Immune Related Pathway                     |                                      |                |                 |                      |                                 |  |
|-----------|------------|---------------|----------|------------------------|-----------------------------------------------------|--------------------------------------|----------------|-----------------|----------------------|---------------------------------|--|
|           |            | Start (bp)    | End (bp) |                        |                                                     |                                      |                |                 |                      |                                 |  |
| CD81      | 11         | 2376177       | 2397802  | protein_coding         | T cell receptor (Immune system)                     | B cell receptor (Immune system)      |                |                 |                      |                                 |  |
| IFITM1    | 11         | 310041        | 315272   | protein_coding         | T cell receptor (Immune system)                     | B cell receptor (Immune system)      |                |                 |                      |                                 |  |
| HRAS      | 11         | 532242        | 537321   | protein_coding         | B cell receptor (Immune system)                     | Chemokine signalling (Immune system) | ERK Signalling | PI3K Signalling | Other RAS Signalling | T cell receptor (Immune system) |  |
| IRF7      | 11         | 612553        | 615983   | protein_coding         | Complement and coagulation cascades (Immune system) | RIG-I-like receptor (Immune system)  |                |                 |                      |                                 |  |
| CTSD      | 11         | 1752752       | 1764573  | protein_coding         | NETWORK VARIATION - NUCLEAR RECEPTOR Signalling     |                                      |                |                 |                      |                                 |  |
| INS       | 11         | 2159779       | 2161221  | protein_coding         | T cell receptor (Immune system)                     | B cell receptor (Immune system)      |                |                 |                      |                                 |  |
| IGF2      | 11         | 2129112       | 2158391  | protein_coding         | T cell receptor (Immune system)                     | B cell receptor (Immune system)      | ERK Signalling | PI3K Signalling |                      |                                 |  |
| WBP1LP10  | 11         | 75780         | 76143    | unprocessed_pseudogene |                                                     |                                      |                |                 |                      |                                 |  |
| OR4F2P    | 11         | 86649         | 87586    | unprocessed_pseudogene |                                                     |                                      |                |                 |                      |                                 |  |
|           | 11         | 112967        | 125927   | lncRNA                 |                                                     |                                      |                |                 |                      |                                 |  |
| CICP23    | 11         | 123312        | 126123   | processed_pseudogene   |                                                     |                                      |                |                 |                      |                                 |  |
| LINC01001 | 11         | 127204        | 139612   | lncRNA                 |                                                     |                                      |                |                 |                      |                                 |  |
|           | 11         | 129279        | 186136   | lncRNA                 |                                                     |                                      |                |                 |                      |                                 |  |
| RNU6-447P | 11         | 152999        | 153102   | snRNA                  |                                                     |                                      |                |                 |                      |                                 |  |
| BET1L     | 11         | 167784        | 207399   | protein_coding         |                                                     |                                      |                |                 |                      |                                 |  |
| SCGB1C1   | 11         | 193078        | 194575   | protein_coding         |                                                     |                                      |                |                 |                      |                                 |  |
| ODF3      | 11         | 196761        | 200261   | protein_coding         |                                                     |                                      |                |                 |                      |                                 |  |
|           | 11         | 203623        | 205470   | lncRNA                 |                                                     |                                      |                |                 |                      |                                 |  |
| RIC8A     | 11         | 207708        | 215113   | protein_coding         |                                                     |                                      |                |                 |                      |                                 |  |
| MIR6743   | 11         | 209336        | 209406   | miRNA                  |                                                     |                                      |                |                 |                      |                                 |  |
| SIRT3     | 11         | 215030        | 236931   | protein_coding         |                                                     |                                      |                |                 |                      |                                 |  |
| PSMD13    | 11         | 236966        | 252984   | protein_coding         |                                                     |                                      |                |                 |                      |                                 |  |
|           | 11         | 243099        | 243483   | processed_pseudogene   |                                                     |                                      |                |                 |                      |                                 |  |

|            |    |        |        |                                |  |  |  |  |  |
|------------|----|--------|--------|--------------------------------|--|--|--|--|--|
| COX8BP     | 11 | 253416 | 269461 | transcribed_unitary_pseudogene |  |  |  |  |  |
| NLRP6      | 11 | 278407 | 285388 | protein_coding                 |  |  |  |  |  |
|            | 11 | 287305 | 288987 | lncRNA                         |  |  |  |  |  |
| PGGHG      | 11 | 289126 | 296107 | protein_coding                 |  |  |  |  |  |
| IFITM5     | 11 | 298200 | 299526 | protein_coding                 |  |  |  |  |  |
| IFITM2     | 11 | 303655 | 309397 | protein_coding                 |  |  |  |  |  |
|            | 11 | 303856 | 304144 | processed_pseudogene           |  |  |  |  |  |
|            | 11 | 308408 | 315272 | protein_coding                 |  |  |  |  |  |
|            | 11 | 310139 | 311141 | lncRNA                         |  |  |  |  |  |
|            | 11 | 318640 | 325631 | lncRNA                         |  |  |  |  |  |
| IFITM3     | 11 | 319676 | 329475 | protein_coding                 |  |  |  |  |  |
|            | 11 | 321991 | 322426 | lncRNA                         |  |  |  |  |  |
|            | 11 | 327171 | 330190 | lncRNA                         |  |  |  |  |  |
|            | 11 | 333192 | 333688 | lncRNA                         |  |  |  |  |  |
| B4GALNT4   | 11 | 369499 | 382117 | protein_coding                 |  |  |  |  |  |
| PKP3       | 11 | 392614 | 404908 | protein_coding                 |  |  |  |  |  |
| SIGIRR     | 11 | 405716 | 417455 | protein_coding                 |  |  |  |  |  |
| ANO9       | 11 | 417933 | 442011 | protein_coding                 |  |  |  |  |  |
| RN7SL838P  | 11 | 440399 | 440693 | misc_RNA                       |  |  |  |  |  |
| PTDSS2     | 11 | 448268 | 491399 | protein_coding                 |  |  |  |  |  |
|            | 11 | 462930 | 463899 | lncRNA                         |  |  |  |  |  |
| RNH1       | 11 | 494512 | 507300 | protein_coding                 |  |  |  |  |  |
|            | 11 | 512513 | 518134 | lncRNA                         |  |  |  |  |  |
|            | 11 | 518991 | 532262 | lncRNA                         |  |  |  |  |  |
|            | 11 | 528907 | 529659 | lncRNA                         |  |  |  |  |  |
| LRRC56     | 11 | 537527 | 554912 | protein_coding                 |  |  |  |  |  |
| LMNTD2     | 11 | 554850 | 560738 | protein_coding                 |  |  |  |  |  |
| LMNTD2-AS1 | 11 | 557595 | 560107 | lncRNA                         |  |  |  |  |  |
| RASSF7     | 11 | 560404 | 564025 | protein_coding                 |  |  |  |  |  |
| MIR210HG   | 11 | 565657 | 568457 | lncRNA                         |  |  |  |  |  |

|          |    |        |         |                |  |  |  |  |  |
|----------|----|--------|---------|----------------|--|--|--|--|--|
| MIR210   | 11 | 568089 | 568198  | miRNA          |  |  |  |  |  |
| PHRF1    | 11 | 576470 | 612222  | protein_coding |  |  |  |  |  |
| CDHR5    | 11 | 616577 | 626078  | protein_coding |  |  |  |  |  |
| SCT      | 11 | 626309 | 627181  | protein_coding |  |  |  |  |  |
| DRD4     | 11 | 637269 | 640706  | protein_coding |  |  |  |  |  |
| DEAF1    | 11 | 644233 | 707118  | protein_coding |  |  |  |  |  |
|          | 11 | 665910 | 678391  | lncRNA         |  |  |  |  |  |
| EPS8L2   | 11 | 694438 | 727727  | protein_coding |  |  |  |  |  |
| TMEM80   | 11 | 695591 | 705028  | protein_coding |  |  |  |  |  |
|          | 11 | 708564 | 727047  | lncRNA         |  |  |  |  |  |
| TALDO1   | 11 | 747415 | 765012  | protein_coding |  |  |  |  |  |
| GATD1    | 11 | 767220 | 777488  | protein_coding |  |  |  |  |  |
| GATD1-DT | 11 | 777574 | 785231  | lncRNA         |  |  |  |  |  |
|          | 11 | 779617 | 780755  | TEC            |  |  |  |  |  |
|          | 11 | 781645 | 782105  | lncRNA         |  |  |  |  |  |
| CEND1    | 11 | 787115 | 790113  | protein_coding |  |  |  |  |  |
| SLC25A22 | 11 | 790475 | 798281  | protein_coding |  |  |  |  |  |
| PANO1    | 11 | 797511 | 799190  | protein_coding |  |  |  |  |  |
| PIDD1    | 11 | 799179 | 809753  | protein_coding |  |  |  |  |  |
| RPLP2    | 11 | 809965 | 812880  | protein_coding |  |  |  |  |  |
| SNORA52  | 11 | 811681 | 811814  | snoRNA         |  |  |  |  |  |
| PNPLA2   | 11 | 818914 | 825573  | protein_coding |  |  |  |  |  |
|          | 11 | 823634 | 832883  | lncRNA         |  |  |  |  |  |
| CRACR2B  | 11 | 826144 | 831991  | protein_coding |  |  |  |  |  |
| CD151    | 11 | 832887 | 839831  | protein_coding |  |  |  |  |  |
| POLR2L   | 11 | 837356 | 842529  | protein_coding |  |  |  |  |  |
| TSPAN4   | 11 | 842812 | 867116  | protein_coding |  |  |  |  |  |
|          | 11 | 856880 | 859795  | lncRNA         |  |  |  |  |  |
| CHID1    | 11 | 867859 | 915058  | protein_coding |  |  |  |  |  |
| AP2A2    | 11 | 924881 | 1012245 | protein_coding |  |  |  |  |  |

|            |    |         |         |                |  |  |  |  |  |
|------------|----|---------|---------|----------------|--|--|--|--|--|
| RNU6-1025P | 11 | 948421  | 948524  | snRNA          |  |  |  |  |  |
| MUC6       | 11 | 1012823 | 1036718 | protein_coding |  |  |  |  |  |
| LINC02688  | 11 | 1049880 | 1055749 | lncRNA         |  |  |  |  |  |
| MUC2       | 11 | 1074875 | 1110511 | protein_coding |  |  |  |  |  |
| MUC5AC     | 11 | 1157953 | 1201138 | protein_coding |  |  |  |  |  |
|            | 11 | 1218530 | 1220242 | lncRNA         |  |  |  |  |  |
| MUC5B      | 11 | 1223066 | 1262172 | protein_coding |  |  |  |  |  |
| MUC5B-AS1  | 11 | 1242261 | 1249676 | lncRNA         |  |  |  |  |  |
| MIR6744    | 11 | 1256605 | 1256670 | miRNA          |  |  |  |  |  |
| TOLLIP     | 11 | 1274371 | 1309654 | protein_coding |  |  |  |  |  |
| TOLLIP-DT  | 11 | 1309769 | 1310707 | lncRNA         |  |  |  |  |  |
|            | 11 | 1333250 | 1337068 | lncRNA         |  |  |  |  |  |
| LINC02689  | 11 | 1350359 | 1364286 | lncRNA         |  |  |  |  |  |
| BRSK2      | 11 | 1389899 | 1462689 | protein_coding |  |  |  |  |  |
|            | 11 | 1464582 | 1467632 | lncRNA         |  |  |  |  |  |
| MOB2       | 11 | 1469457 | 1501247 | protein_coding |  |  |  |  |  |
| DUSP8      | 11 | 1554051 | 1572271 | protein_coding |  |  |  |  |  |
| KRTAP5-AS1 | 11 | 1571353 | 1599184 | lncRNA         |  |  |  |  |  |
| KRTAP5-1   | 11 | 1584342 | 1585283 | protein_coding |  |  |  |  |  |
| KRTAP5-2   | 11 | 1597177 | 1598294 | protein_coding |  |  |  |  |  |
| KRTAP5-3   | 11 | 1607565 | 1608463 | protein_coding |  |  |  |  |  |
| KRTAP5-4   | 11 | 1620958 | 1622138 | protein_coding |  |  |  |  |  |
| KRTAP5-5   | 11 | 1629775 | 1630930 | protein_coding |  |  |  |  |  |
|            | 11 | 1662584 | 1663343 | lncRNA         |  |  |  |  |  |
| FAM99A     | 11 | 1665597 | 1667856 | lncRNA         |  |  |  |  |  |
| FAM99B     | 11 | 1683269 | 1685629 | lncRNA         |  |  |  |  |  |
| LINC02708  | 11 | 1688297 | 1689056 | lncRNA         |  |  |  |  |  |
| KRTAP5-6   | 11 | 1697195 | 1697755 | protein_coding |  |  |  |  |  |
| IFITM10    | 11 | 1732406 | 1750595 | protein_coding |  |  |  |  |  |
|            | 11 | 1734821 | 1763954 | protein_coding |  |  |  |  |  |

|            |    |         |         |                      |  |  |  |  |  |  |
|------------|----|---------|---------|----------------------|--|--|--|--|--|--|
| PRADX      | 11 | 1760348 | 1762486 | lncRNA               |  |  |  |  |  |  |
|            | 11 | 1763009 | 1763749 | lncRNA               |  |  |  |  |  |  |
|            | 11 | 1773745 | 1774903 | lncRNA               |  |  |  |  |  |  |
|            | 11 | 1776930 | 1778388 | lncRNA               |  |  |  |  |  |  |
| RPL36AP39  | 11 | 1792553 | 1792870 | processed_pseudogene |  |  |  |  |  |  |
|            | 11 | 1802889 | 1804095 | processed_pseudogene |  |  |  |  |  |  |
| SYT8       | 11 | 1828307 | 1837521 | protein_coding       |  |  |  |  |  |  |
| TNNI2      | 11 | 1838981 | 1841680 | protein_coding       |  |  |  |  |  |  |
| LSP1       | 11 | 1850904 | 1892267 | protein_coding       |  |  |  |  |  |  |
| MIR4298    | 11 | 1859464 | 1859536 | miRNA                |  |  |  |  |  |  |
|            | 11 | 1864177 | 1866667 | lncRNA               |  |  |  |  |  |  |
| MIR7847    | 11 | 1880045 | 1880147 | miRNA                |  |  |  |  |  |  |
| PRR33      | 11 | 1888078 | 1891895 | protein_coding       |  |  |  |  |  |  |
| LINC01150  | 11 | 1897015 | 1908656 | lncRNA               |  |  |  |  |  |  |
| TNNT3      | 11 | 1919703 | 1938706 | protein_coding       |  |  |  |  |  |  |
| MRPL23     | 11 | 1947278 | 1984522 | protein_coding       |  |  |  |  |  |  |
| MRPL23-AS1 | 11 | 1983237 | 1989993 | lncRNA               |  |  |  |  |  |  |
| LINC01219  | 11 | 1991096 | 1993670 | lncRNA               |  |  |  |  |  |  |
| H19        | 11 | 1995166 | 2004552 | lncRNA               |  |  |  |  |  |  |
|            | 11 | 1996540 | 1996610 | misc_RNA             |  |  |  |  |  |  |
| MIR675     | 11 | 1996759 | 1996831 | miRNA                |  |  |  |  |  |  |
|            | 11 | 1997484 | 1997552 | misc_RNA             |  |  |  |  |  |  |
|            | 11 | 2129121 | 2129964 | lncRNA               |  |  |  |  |  |  |
|            | 11 | 2131395 | 2149603 | protein_coding       |  |  |  |  |  |  |
| INS-IGF2   | 11 | 2132538 | 2161209 | protein_coding       |  |  |  |  |  |  |
| MIR483     | 11 | 2134134 | 2134209 | miRNA                |  |  |  |  |  |  |
| IGF2-AS    | 11 | 2140501 | 2148666 | lncRNA               |  |  |  |  |  |  |
| TH         | 11 | 2163929 | 2171815 | protein_coding       |  |  |  |  |  |  |
| MIR4686    | 11 | 2173063 | 2173138 | miRNA                |  |  |  |  |  |  |
| ASCL2      | 11 | 2268498 | 2270588 | protein_coding       |  |  |  |  |  |  |

|                |    |         |         |                                  |  |  |  |  |  |
|----------------|----|---------|---------|----------------------------------|--|--|--|--|--|
| C11orf21       | 11 | 2295628 | 2303049 | protein coding                   |  |  |  |  |  |
| TSPAN32        | 11 | 2301997 | 2318204 | protein coding                   |  |  |  |  |  |
| RNU6-878P      | 11 | 2321718 | 2321827 | snRNA                            |  |  |  |  |  |
| CD81-AS1       | 11 | 2328749 | 2377992 | lncRNA                           |  |  |  |  |  |
| RPL26P30       | 11 | 2335135 | 2347685 | transcribed_processed_pseudogene |  |  |  |  |  |
|                | 11 | 2336133 | 2342114 | lncRNA                           |  |  |  |  |  |
|                | 11 | 2371538 | 2375401 | lncRNA                           |  |  |  |  |  |
| Y_RNA          | 11 | 2372638 | 2372750 | misc RNA                         |  |  |  |  |  |
| TSSC4          | 11 | 2400488 | 2403878 | protein coding                   |  |  |  |  |  |
|                | 11 | 2404515 | 2407908 | lncRNA                           |  |  |  |  |  |
| TRPM5          | 11 | 2404515 | 2444514 | protein coding                   |  |  |  |  |  |
| KCNQ1          | 11 | 2444654 | 2849105 | protein coding                   |  |  |  |  |  |
| KCNQ1OT1       | 11 | 2597308 | 2700003 | lncRNA                           |  |  |  |  |  |
|                | 11 | 2652099 | 2652562 | misc RNA                         |  |  |  |  |  |
|                | 11 | 2674097 | 2674292 | misc RNA                         |  |  |  |  |  |
|                | 11 | 2674625 | 2674740 | misc RNA                         |  |  |  |  |  |
|                | 11 | 2697851 | 2698076 | misc RNA                         |  |  |  |  |  |
| COX6CP18       | 11 | 2771356 | 2771577 | processed_pseudogene             |  |  |  |  |  |
| KCNQ1-AS1      | 11 | 2840135 | 2861568 | lncRNA                           |  |  |  |  |  |
| KCNQ1DN        | 11 | 2870033 | 2872105 | lncRNA                           |  |  |  |  |  |
|                | 11 | 2871437 | 2871498 | misc RNA                         |  |  |  |  |  |
| CDKN1C         | 11 | 2883213 | 2885775 | protein coding                   |  |  |  |  |  |
| SLC22A18A<br>S | 11 | 2887344 | 2903813 | lncRNA                           |  |  |  |  |  |
| SLC22A18       | 11 | 2899721 | 2925246 | protein coding                   |  |  |  |  |  |
| PHLDA2         | 11 | 2928273 | 2929420 | protein coding                   |  |  |  |  |  |
| NAP1L4         | 11 | 2944431 | 2992377 | protein coding                   |  |  |  |  |  |
| SNORA54        | 11 | 2963771 | 2963893 | snoRNA                           |  |  |  |  |  |
|                | 11 | 2989863 | 2991344 | lncRNA                           |  |  |  |  |  |
| CARS1          | 11 | 3000922 | 3057613 | protein coding                   |  |  |  |  |  |
| CARS1-AS1      | 11 | 3029009 | 3041260 | lncRNA                           |  |  |  |  |  |

|            |    |         |         |                                    |  |  |  |  |  |
|------------|----|---------|---------|------------------------------------|--|--|--|--|--|
| RNU1-91P   | 11 | 3048359 | 3048521 | snRNA                              |  |  |  |  |  |
|            | 11 | 3057538 | 3064707 | lncRNA                             |  |  |  |  |  |
|            | 11 | 3084393 | 3085443 | processed_pseudogene               |  |  |  |  |  |
| OSBPL5     | 11 | 3087107 | 3166739 | protein_coding                     |  |  |  |  |  |
|            | 11 | 3189546 | 3189929 | lncRNA                             |  |  |  |  |  |
| MRGPRG     | 11 | 3217944 | 3218813 | protein_coding                     |  |  |  |  |  |
| MRGPRG-AS1 | 11 | 3218332 | 3223131 | lncRNA                             |  |  |  |  |  |
| MRGPRE     | 11 | 3225030 | 3232417 | protein_coding                     |  |  |  |  |  |
|            | 11 | 3226061 | 3232838 | lncRNA                             |  |  |  |  |  |
| NDUFA5P8   | 11 | 3276045 | 3276390 | processed_pseudogene               |  |  |  |  |  |
|            | 11 | 3289311 | 3289642 | processed_pseudogene               |  |  |  |  |  |
| NDUFA5P1   | 11 | 3321862 | 3322202 | processed_pseudogene               |  |  |  |  |  |
|            | 11 | 3335125 | 3335407 | processed_pseudogene               |  |  |  |  |  |
|            | 11 | 3336721 | 3340630 | lncRNA                             |  |  |  |  |  |
| ZNF195     | 11 | 3339261 | 3379222 | protein_coding                     |  |  |  |  |  |
|            | 11 | 3380918 | 3408981 | lncRNA                             |  |  |  |  |  |
| OR7E12P    | 11 | 3390780 | 3391752 | unprocessed_pseudogene             |  |  |  |  |  |
| TSSC2      | 11 | 3401759 | 3408810 | transcribed_unprocessed_pseudogene |  |  |  |  |  |
| FAM86GP    | 11 | 3410352 | 3422496 | unprocessed_pseudogene             |  |  |  |  |  |
| ENPP7P15   | 11 | 3429758 | 3500621 | transcribed_unprocessed_pseudogene |  |  |  |  |  |
|            | 11 | 3469319 | 3531328 | lncRNA                             |  |  |  |  |  |
|            | 11 | 3475280 | 3477065 | lncRNA                             |  |  |  |  |  |
|            | 11 | 3475778 | 3581211 | lncRNA                             |  |  |  |  |  |



Supplementary Table 4: List of genes with single copy loss at chromosome 15 from position 23,500,000 until 31,500,000. Shaded rows highlighted significant genes when altered may relate to cancer or render immune system defective.

| Gene name   | Chromosome | Gene Position |          | Gene type            | Cancer / Immune Related Pathway                  |
|-------------|------------|---------------|----------|----------------------|--------------------------------------------------|
|             |            | Start (bp)    | End (bp) |                      |                                                  |
| TJP1        | 15         | 29699367      | 29968915 | protein_coding       | Fc gamma R-mediated phagocytosis (Immune system) |
| UBE3A       | 15         | 25333728      | 25439051 | protein_coding       | Fc gamma R-mediated phagocytosis (Immune system) |
| MIR4508     | 15         | 23562062      | 23562131 | miRNA                |                                                  |
|             | 15         | 23565265      | 23569657 | lncRNA               |                                                  |
| MKRN3       | 15         | 23565674      | 23630075 | protein_coding       |                                                  |
| MAGEL2      | 15         | 23643549      | 23647867 | protein_coding       |                                                  |
| NDN         | 15         | 23685400      | 23687305 | protein_coding       |                                                  |
|             | 15         | 23757115      | 23856375 | lncRNA               |                                                  |
| RNU6-741P   | 15         | 23777437      | 23777543 | snRNA                |                                                  |
| PWRN4       | 15         | 23912411      | 24090821 | lncRNA               |                                                  |
| PWRN1       | 15         | 24101827      | 24823365 | lncRNA               |                                                  |
| PWRN2       | 15         | 24162754      | 24169948 | lncRNA               |                                                  |
|             | 15         | 24206784      | 24225854 | lncRNA               |                                                  |
|             | 15         | 24238145      | 24240192 | lncRNA               |                                                  |
|             | 15         | 24341729      | 24343464 | lncRNA               |                                                  |
|             | 15         | 24558060      | 24912924 | lncRNA               |                                                  |
| NPAP1       | 15         | 24675775      | 24683393 | protein_coding       |                                                  |
| SNRPN       | 15         | 24823637      | 24978723 | protein_coding       |                                                  |
|             | 15         | 24848355      | 24852253 | lncRNA               |                                                  |
| RPL5P1      | 15         | 24908932      | 24909825 | processed_pseudogene |                                                  |
| RPS27P2     | 15         | 24910874      | 24911125 | processed_pseudogene |                                                  |
| SNURF       | 15         | 24954987      | 24977850 | protein_coding       |                                                  |
|             | 15         | 24955034      | 25000276 | protein_coding       |                                                  |
| SNHG14      | 15         | 24978583      | 25420336 | lncRNA               |                                                  |
| SNORD107    | 15         | 24981994      | 24982068 | snoRNA               |                                                  |
| PWAR5       | 15         | 24985053      | 24988232 | TEC                  |                                                  |
| SNORD64     | 15         | 24985100      | 24985166 | snoRNA               |                                                  |
| SNORD108    | 15         | 24986925      | 24986995 | snoRNA               |                                                  |
|             | 15         | 25027736      | 25032047 | lncRNA               |                                                  |
| SNORD109A   | 15         | 25041974      | 25042040 | snoRNA               |                                                  |
| SNORD116-1  | 15         | 25051477      | 25051571 | snoRNA               |                                                  |
| SNORD116-2  | 15         | 25054210      | 25054304 | snoRNA               |                                                  |
| SNORD116-3  | 15         | 25056860      | 25056954 | snoRNA               |                                                  |
| SNORD116-4  | 15         | 25059538      | 25059633 | snoRNA               |                                                  |
| SNORD116-5  | 15         | 25062333      | 25062427 | snoRNA               |                                                  |
| SNORD116-6  | 15         | 25065026      | 25065121 | snoRNA               |                                                  |
| SNORD116-7  | 15         | 25067788      | 25067882 | snoRNA               |                                                  |
| SNORD116-8  | 15         | 25070432      | 25070526 | snoRNA               |                                                  |
| SNORD116-9  | 15         | 25073107      | 25073201 | snoRNA               |                                                  |
| SNORD116-10 | 15         | 25074114      | 25074215 | snoRNA               |                                                  |
| SNORD116-11 | 15         | 25075929      | 25076020 | snoRNA               |                                                  |
| SNORD116-12 | 15         | 25077051      | 25077142 | snoRNA               |                                                  |

|             |    |          |          |                      |  |
|-------------|----|----------|----------|----------------------|--|
| SNORD116-13 | 15 | 25079058 | 25079149 | snoRNA               |  |
| SNORD116-14 | 15 | 25080142 | 25080233 | snoRNA               |  |
| SNORD116-15 | 15 | 25081287 | 25081378 | snoRNA               |  |
| SNORD116-16 | 15 | 25082768 | 25082859 | snoRNA               |  |
| SNORD116-17 | 15 | 25083588 | 25083679 | snoRNA               |  |
| SNORD116-18 | 15 | 25085385 | 25085476 | snoRNA               |  |
| SNORD116-19 | 15 | 25086527 | 25086618 | snoRNA               |  |
|             | 15 | 25087661 | 25088896 | lncRNA               |  |
| SNORD116-20 | 15 | 25087662 | 25087753 | snoRNA               |  |
| SNORD116-21 | 15 | 25088804 | 25088895 | snoRNA               |  |
| SNORD116-22 | 15 | 25089923 | 25090014 | snoRNA               |  |
| SNORD116-23 | 15 | 25091786 | 25091877 | snoRNA               |  |
|             | 15 | 25091786 | 25107469 | lncRNA               |  |
|             | 15 | 25091960 | 25092377 | TEC                  |  |
| SNORD116-24 | 15 | 25094037 | 25094128 | snoRNA               |  |
| SNORD116-25 | 15 | 25097663 | 25097754 | snoRNA               |  |
| SNORD116-26 | 15 | 25099499 | 25099594 | snoRNA               |  |
| SNORD116-27 | 15 | 25101575 | 25101666 | snoRNA               |  |
| SNORD116-28 | 15 | 25104642 | 25104732 | snoRNA               |  |
| SNORD116-29 | 15 | 25106521 | 25106603 | snoRNA               |  |
| SNORD116-30 | 15 | 25108268 | 25108352 | snoRNA               |  |
| PWAR1       | 15 | 25135642 | 25138055 | TEC                  |  |
| SNORD115    | 15 | 25159221 | 25159279 | snoRNA               |  |
| DMAC1P1     | 15 | 25169337 | 25169676 | processed_pseudogene |  |
| SNORD115-1  | 15 | 25170723 | 25170804 | snoRNA               |  |
| SNORD115-2  | 15 | 25172635 | 25172716 | snoRNA               |  |
| SNORD115-3  | 15 | 25174927 | 25175008 | snoRNA               |  |
| SNORD115-4  | 15 | 25176832 | 25176913 | snoRNA               |  |
| SNORD115-5  | 15 | 25178738 | 25178819 | snoRNA               |  |
| SNORD115-6  | 15 | 25180497 | 25180578 | snoRNA               |  |
| SNORD115-7  | 15 | 25182385 | 25182466 | snoRNA               |  |
| SNORD115-8  | 15 | 25184306 | 25184387 | snoRNA               |  |
| SNORD115-9  | 15 | 25185631 | 25185712 | snoRNA               |  |
| SNORD115-10 | 15 | 25187536 | 25187616 | snoRNA               |  |
| SNORD115-11 | 15 | 25189414 | 25189495 | snoRNA               |  |
| SNORD115-12 | 15 | 25191416 | 25191497 | snoRNA               |  |
| SNORD115-13 | 15 | 25193321 | 25193402 | snoRNA               |  |
| SNORD115-14 | 15 | 25194921 | 25195001 | snoRNA               |  |
| SNORD115-15 | 15 | 25197576 | 25197656 | snoRNA               |  |
| SNORD115-16 | 15 | 25199448 | 25199529 | snoRNA               |  |
| SNORD115-17 | 15 | 25201323 | 25201404 | snoRNA               |  |
| SNORD115-18 | 15 | 25203227 | 25203308 | snoRNA               |  |
| SNORD115-19 | 15 | 25204357 | 25204438 | snoRNA               |  |
| SNORD115-20 | 15 | 25206262 | 25206343 | snoRNA               |  |
| SNORD115-21 | 15 | 25208083 | 25208163 | snoRNA               |  |
| SNORD115-22 | 15 | 25209918 | 25209999 | snoRNA               |  |

|             |    |          |          |                      |  |
|-------------|----|----------|----------|----------------------|--|
| SNORD115-23 | 15 | 25211796 | 25211877 | snoRNA               |  |
| SNORD115-24 | 15 | 25213648 | 25213729 | snoRNA               |  |
| SNORD115-25 | 15 | 25215541 | 25215622 | snoRNA               |  |
| SNORD115-26 | 15 | 25218617 | 25218698 | snoRNA               |  |
| SNORD115-27 | 15 | 25220497 | 25220578 | snoRNA               |  |
| SNORD115-28 | 15 | 25222348 | 25222428 | snoRNA               |  |
| SNORD115-29 | 15 | 25223246 | 25223327 | snoRNA               |  |
| SNORD115-30 | 15 | 25225203 | 25225284 | snoRNA               |  |
| SNORD115-31 | 15 | 25227109 | 25227190 | snoRNA               |  |
| SNORD115-32 | 15 | 25228967 | 25229048 | snoRNA               |  |
| SNORD115-33 | 15 | 25230838 | 25230919 | snoRNA               |  |
| SNORD115-34 | 15 | 25232387 | 25232468 | snoRNA               |  |
| SNORD115-35 | 15 | 25234247 | 25234328 | snoRNA               |  |
| SNORD115-36 | 15 | 25236085 | 25236166 | snoRNA               |  |
| SNORD115-37 | 15 | 25237986 | 25238067 | snoRNA               |  |
| SNORD115-38 | 15 | 25239838 | 25239919 | snoRNA               |  |
| SNORD115-39 | 15 | 25241746 | 25241827 | snoRNA               |  |
| SNORD115-40 | 15 | 25243614 | 25243695 | snoRNA               |  |
| SNORD115-41 | 15 | 25245478 | 25245559 | snoRNA               |  |
| SNORD115-42 | 15 | 25247345 | 25247426 | snoRNA               |  |
| SNORD115-43 | 15 | 25249198 | 25249279 | snoRNA               |  |
| SNORD115-44 | 15 | 25250859 | 25250940 | snoRNA               |  |
|             | 15 | 25255579 | 25257027 | TEC                  |  |
| SNORD115-45 | 15 | 25264510 | 25264590 | snoRNA               |  |
| SNORD115-46 | 15 | 25266591 | 25266661 | snoRNA               |  |
| SNORD115-47 | 15 | 25268466 | 25268551 | snoRNA               |  |
| SNORD115-48 | 15 | 25269783 | 25269858 | snoRNA               |  |
| SNORD109B   | 15 | 25278343 | 25278409 | snoRNA               |  |
|             | 15 | 25345633 | 25347235 | lncRNA               |  |
| LINC02250   | 15 | 25456271 | 25578813 | lncRNA               |  |
|             | 15 | 25580969 | 25581122 | processed_pseudogene |  |
|             | 15 | 25636451 | 25641767 | lncRNA               |  |
| ATP10A      | 15 | 25677273 | 25865184 | protein_coding       |  |
| RNA5SP390   | 15 | 25738508 | 25738620 | rRNA_pseudogene      |  |
| MIR4715     | 15 | 25848747 | 25848825 | miRNA                |  |
| ATP10A-DT   | 15 | 25865295 | 25877211 | lncRNA               |  |
| LINC02346   | 15 | 25902119 | 26053123 | lncRNA               |  |
|             | 15 | 25928146 | 25928575 | processed_pseudogene |  |
|             | 15 | 26008940 | 26009074 | snoRNA               |  |
|             | 15 | 26050538 | 26052276 | lncRNA               |  |
| LINC00929   | 15 | 26115726 | 26134001 | lncRNA               |  |
|             | 15 | 26261669 | 26265918 | lncRNA               |  |
| LINC02248   | 15 | 26395037 | 26455219 | lncRNA               |  |
|             | 15 | 26403480 | 26477840 | lncRNA               |  |
| GABRB3      | 15 | 26543552 | 26939539 | protein_coding       |  |
|             | 15 | 26557598 | 26557937 | lncRNA               |  |

|             |    |          |          |                                    |  |
|-------------|----|----------|----------|------------------------------------|--|
|             | 15 | 26657030 | 26658763 | lncRNA                             |  |
|             | 15 | 26851132 | 26851610 | processed_pseudogene               |  |
| GABRA5      | 15 | 26866911 | 26949208 | protein_coding                     |  |
| TVP23BP1    | 15 | 26964917 | 26970385 | unprocessed_pseudogene             |  |
| GABRG3      | 15 | 26971181 | 27541984 | protein_coding                     |  |
| GABRG3-AS1  | 15 | 27038978 | 27161319 | lncRNA                             |  |
|             | 15 | 27208089 | 27208635 | processed_pseudogene               |  |
| RNA5SP391   | 15 | 27280318 | 27280436 | rRNA_pseudogene                    |  |
| SERPINE4P   | 15 | 27340524 | 27340804 | processed_pseudogene               |  |
|             | 15 | 27362310 | 27366398 | lncRNA                             |  |
|             | 15 | 27418796 | 27420735 | lncRNA                             |  |
|             | 15 | 27422381 | 27428338 | lncRNA                             |  |
|             | 15 | 27483035 | 27541991 | lncRNA                             |  |
|             | 15 | 27621534 | 27629289 | lncRNA                             |  |
|             | 15 | 27662715 | 27667273 | lncRNA                             |  |
|             | 15 | 27684498 | 27685768 | lncRNA                             |  |
| OCA2        | 15 | 27754875 | 28099315 | protein_coding                     |  |
|             | 15 | 27775621 | 27776798 | lncRNA                             |  |
| RPL5P32     | 15 | 27895704 | 27896582 | processed_pseudogene               |  |
| HERC2       | 15 | 28111040 | 28322179 | protein_coding                     |  |
| RPL41P2     | 15 | 28315651 | 28316059 | processed_pseudogene               |  |
| HERC2P1     | 15 | 28332237 | 28336609 | unprocessed_pseudogene             |  |
|             | 15 | 28346490 | 28346647 | unprocessed_pseudogene             |  |
| GOLGA6L24   | 15 | 28347851 | 28358084 | protein_coding                     |  |
| MPHOSPH10P7 | 15 | 28362796 | 28365731 | unprocessed_pseudogene             |  |
| GOLGA8F     | 15 | 28378621 | 28392021 | protein_coding                     |  |
| RN7SL238P   | 15 | 28387196 | 28387485 | misc_RNA                           |  |
| ABCB10P3    | 15 | 28402868 | 28405033 | processed_pseudogene               |  |
|             | 15 | 28416449 | 28416674 | unprocessed_pseudogene             |  |
|             | 15 | 28422172 | 28422373 | unprocessed_pseudogene             |  |
| MIR4509-2   | 15 | 28426491 | 28426584 | miRNA                              |  |
|             | 15 | 28444144 | 28444264 | unprocessed_pseudogene             |  |
|             | 15 | 28454660 | 28457783 | unprocessed_pseudogene             |  |
|             | 15 | 28473322 | 28473448 | unprocessed_pseudogene             |  |
| MIR4509-3   | 15 | 28490752 | 28490845 | miRNA                              |  |
|             | 15 | 28494975 | 28495182 | unprocessed_pseudogene             |  |
| ABCB10P4    | 15 | 28506625 | 28508808 | processed_pseudogene               |  |
| GOLGA8G     | 15 | 28519611 | 28533014 | protein_coding                     |  |
| Metazoa_SRP | 15 | 28524151 | 28524440 | misc_RNA                           |  |
|             | 15 | 28545912 | 28549777 | unprocessed_pseudogene             |  |
| GOLGA6L25   | 15 | 28553568 | 28563779 | protein_coding                     |  |
|             | 15 | 28564986 | 28565152 | unprocessed_pseudogene             |  |
| HERC2P11    | 15 | 28575019 | 28579400 | unprocessed_pseudogene             |  |
|             | 15 | 28589469 | 28642421 | lncRNA                             |  |
| HERC2P9     | 15 | 28590189 | 28674027 | transcribed_unprocessed_pseudogene |  |
| HERC2P9     | 15 | 28651421 | 28685264 | lncRNA                             |  |

|           |    |          |          |                                    |  |
|-----------|----|----------|----------|------------------------------------|--|
|           | 15 | 28679405 | 28682252 | unprocessed_pseudogene             |  |
| GOLGA8M   | 15 | 28698583 | 28738384 | protein_coding                     |  |
| RN7SL719P | 15 | 28703554 | 28703790 | misc_RNA                           |  |
| GOLGA8M   | 15 | 28719377 | 28738431 | lncRNA                             |  |
| WHAMMP2   | 15 | 28737583 | 28754869 | transcribed_unprocessed_pseudogene |  |
|           | 15 | 28738022 | 28759204 | lncRNA                             |  |
|           | 15 | 28763440 | 28764151 | processed_pseudogene               |  |
|           | 15 | 28788243 | 28789392 | lncRNA                             |  |
|           | 15 | 28788602 | 28792002 | transcribed_unprocessed_pseudogene |  |
|           | 15 | 28789199 | 28789486 | transcribed_processed_pseudogene   |  |
|           | 15 | 28789664 | 28808298 | lncRNA                             |  |
| PDCD6IPP2 | 15 | 28801366 | 28818999 | transcribed_unprocessed_pseudogene |  |
|           | 15 | 28815346 | 28859007 | lncRNA                             |  |
|           | 15 | 28830619 | 28831182 | processed_pseudogene               |  |
| GOLGA6L7  | 15 | 28841832 | 28848675 | protein_coding                     |  |
|           | 15 | 28852110 | 28852902 | lncRNA                             |  |
|           | 15 | 28857882 | 28858398 | processed_pseudogene               |  |
|           | 15 | 28881667 | 28884655 | lncRNA                             |  |
| APBA2     | 15 | 28884483 | 29118315 | protein_coding                     |  |
|           | 15 | 28970196 | 28977464 | lncRNA                             |  |
| ENTREP2   | 15 | 29120252 | 29570979 | protein_coding                     |  |
|           | 15 | 29233673 | 29235137 | processed_pseudogene               |  |
|           | 15 | 29233868 | 29233979 | snoRNA                             |  |
| NSMCE3    | 15 | 29264989 | 29269822 | protein_coding                     |  |
|           | 15 | 29373602 | 29376956 | lncRNA                             |  |
|           | 15 | 29609676 | 29611212 | lncRNA                             |  |
| TUBBP8    | 15 | 29612570 | 29614274 | processed_pseudogene               |  |
|           | 15 | 29664477 | 29669482 | lncRNA                             |  |
| LCIAR     | 15 | 29674932 | 29680957 | lncRNA                             |  |
|           | 15 | 29728186 | 29729531 | lncRNA                             |  |
| HMG2P5    | 15 | 29730713 | 29730985 | processed_pseudogene               |  |
|           | 15 | 29822631 | 29824081 | lncRNA                             |  |
| NCAPGP2   | 15 | 30005205 | 30006430 | unprocessed_pseudogene             |  |
|           | 15 | 30005443 | 30045848 | lncRNA                             |  |
| SYNGR2P1  | 15 | 30044455 | 30045296 | processed_pseudogene               |  |
|           | 15 | 30052942 | 30073064 | lncRNA                             |  |
|           | 15 | 30072620 | 30072958 | transcribed_unprocessed_pseudogene |  |
| GOLGA8J   | 15 | 30082955 | 30096690 | protein_coding                     |  |
| RN7SL673P | 15 | 30091662 | 30091898 | misc_RNA                           |  |
| DNM1P28   | 15 | 30098826 | 30102093 | unprocessed_pseudogene             |  |
| ULK4P3    | 15 | 30103720 | 30131757 | lncRNA                             |  |
| ULK4P3    | 15 | 30110302 | 30127785 | transcribed_unprocessed_pseudogene |  |
| U8        | 15 | 30112198 | 30112330 | snoRNA                             |  |
| GOLGA8T   | 15 | 30135051 | 30148748 | protein_coding                     |  |
| RN7SL469P | 15 | 30143733 | 30143969 | misc_RNA                           |  |
| DNM1P30   | 15 | 30150872 | 30153409 | unprocessed_pseudogene             |  |

|              |    |          |          |                                    |
|--------------|----|----------|----------|------------------------------------|
|              | 15 | 30153933 | 30154110 | unprocessed_pseudogene             |
|              | 15 | 30170563 | 30179943 | lncRNA                             |
| LINC02249    | 15 | 30195809 | 30217552 | lncRNA                             |
|              | 15 | 30223017 | 30225564 | processed_pseudogene               |
| RNU6-17P     | 15 | 30254402 | 30254508 | snRNA                              |
|              | 15 | 30282533 | 30288389 | processed_pseudogene               |
|              | 15 | 30344307 | 30348236 | TEC                                |
| Y_RNA        | 15 | 30355436 | 30355540 | misc_RNA                           |
| CHRFAM7A     | 15 | 30360566 | 30393849 | protein_coding                     |
|              | 15 | 30361751 | 30366788 | lncRNA                             |
|              | 15 | 30380353 | 30386987 | transcribed_unprocessed_pseudogene |
| U8           | 15 | 30384959 | 30385091 | snoRNA                             |
|              | 15 | 30395146 | 30396368 | unprocessed_pseudogene             |
| GOLGA8R      | 15 | 30400562 | 30414260 | protein_coding                     |
| RN7SL196P    | 15 | 30405307 | 30405597 | misc_RNA                           |
|              | 15 | 30417251 | 30471673 | lncRNA                             |
|              | 15 | 30420283 | 30420429 | unprocessed_pseudogene             |
| LINC02256    | 15 | 30427080 | 30470946 | lncRNA                             |
| WHAMMP4      | 15 | 30470779 | 30484689 | transcribed_unprocessed_pseudogene |
|              | 15 | 30477821 | 30507623 | lncRNA                             |
|              | 15 | 30487963 | 30490313 | lncRNA                             |
| MPHOSPH10P3  | 15 | 30507377 | 30513698 | unprocessed_pseudogene             |
|              | 15 | 30516079 | 30517867 | unprocessed_pseudogene             |
|              | 15 | 30540093 | 30545969 | lncRNA                             |
| GOLGA8Q      | 15 | 30552050 | 30565684 | protein_coding                     |
| RN7SL796P    | 15 | 30560644 | 30560934 | misc_RNA                           |
| DNM1P50      | 15 | 30567822 | 30571089 | unprocessed_pseudogene             |
| ULK4P2       | 15 | 30572738 | 30600647 | lncRNA                             |
| ULK4P2       | 15 | 30579285 | 30596738 | transcribed_unprocessed_pseudogene |
| U8           | 15 | 30581184 | 30581316 | snoRNA                             |
| GOLGA8H      | 15 | 30604028 | 30617752 | protein_coding                     |
|              | 15 | 30607695 | 30608193 | lncRNA                             |
| RN7SL628P    | 15 | 30612724 | 30612960 | misc_RNA                           |
|              | 15 | 30616958 | 30617749 | lncRNA                             |
| ARHGAP11B-DT | 15 | 30616998 | 30625773 | lncRNA                             |
| ARHGAP11B    | 15 | 30624494 | 30649529 | protein_coding                     |
|              | 15 | 30624548 | 30773002 | protein_coding                     |
|              | 15 | 30644639 | 30658868 | transcribed_unprocessed_pseudogene |
|              | 15 | 30646132 | 30723495 | lncRNA                             |
|              | 15 | 30658717 | 30772993 | lncRNA                             |
| Y_RNA        | 15 | 30673750 | 30673843 | misc_RNA                           |
|              | 15 | 30750406 | 30759859 | transcribed_unprocessed_pseudogene |
| GOLGA8UP     | 15 | 30791573 | 30801859 | unprocessed_pseudogene             |
| RN7SL82P     | 15 | 30800160 | 30800396 | misc_RNA                           |
| HERC2P10     | 15 | 30815271 | 30844153 | unprocessed_pseudogene             |
| TMEM183AP3   | 15 | 30882267 | 30883231 | processed_pseudogene               |

|           |    |          |          |                        |  |
|-----------|----|----------|----------|------------------------|--|
| FAN1      | 15 | 30890559 | 30943108 | protein_coding         |  |
|           | 15 | 30899480 | 30900327 | unprocessed_pseudogene |  |
| MTMR10    | 15 | 30938941 | 30991628 | protein_coding         |  |
| RNU6-466P | 15 | 30956248 | 30956350 | snRNA                  |  |
|           | 15 | 30992171 | 31042302 | lncRNA                 |  |
| TRPM1     | 15 | 31001065 | 31161160 | protein_coding         |  |
| MIR211    | 15 | 31065032 | 31065141 | miRNA                  |  |
| LINC03034 | 15 | 31202934 | 31230886 | lncRNA                 |  |
| LINC02352 | 15 | 31215622 | 31224445 | lncRNA                 |  |
| KLF13     | 15 | 31326835 | 31435665 | protein_coding         |  |
| UBE2CP4   | 15 | 31420128 | 31420662 | processed_pseudogene   |  |
|           | 15 | 31453201 | 31454139 | processed_pseudogene   |  |
| OTUD7A    | 15 | 31475398 | 31870789 | protein_coding         |  |
